# Supplementary material for: Green Ultrasound-Assisted Synthesis of Rare-Earth-Based MOFs
Source: MDPI journal article supplement (doi:10.3390/molecules28166088), 2023-08-16
Supplement: s1 [file s1]

## SUPPORTING INFORMATION

### Green ultrasound assisted synthesis of rare-earth-based MOFs

Francesca Lo Presti, Anna Lucia Pellegrino, Nancy Consoli, Graziella Malandrino\*

Dipartimento di Scienze Chimiche, Università di Catania, and INSTM UdR Catania, Viale A. Doria 6, I-95125 Catania, Italy.

\*Correspondence: gmalandrino@unict.it

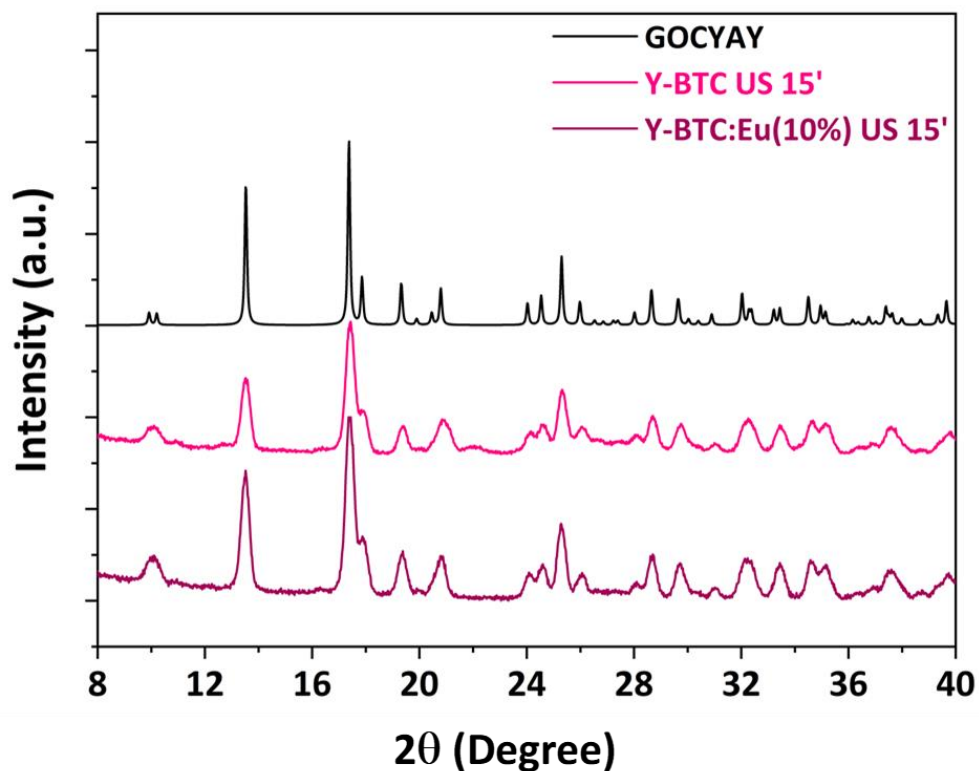

Figura S1. Comparison of the Y-BTC US 15', Y-BTC: Eu US 15' and GOCYAY-Y(BTC)(H<sub>2</sub>O)<sub>6</sub> structures.

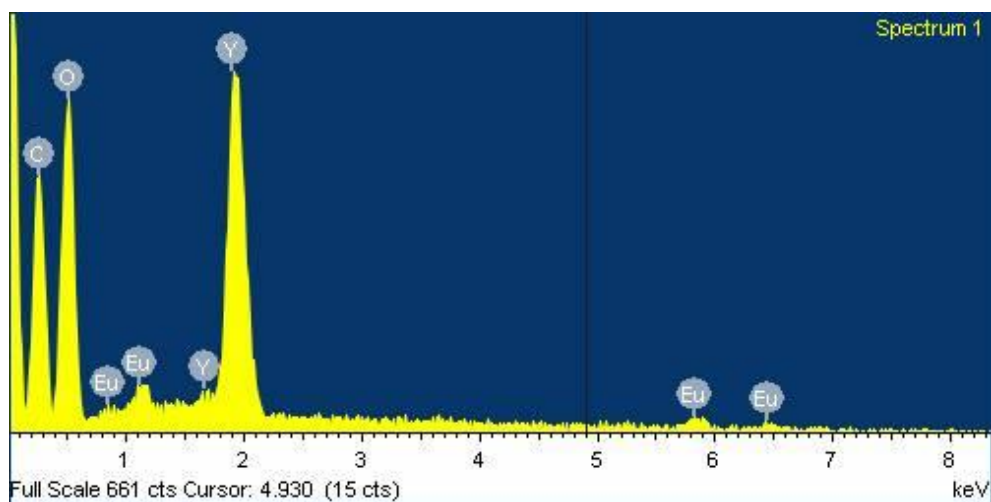

Figura S2. EDX spectrum of the Y-BTC: Eu US 90' sample.

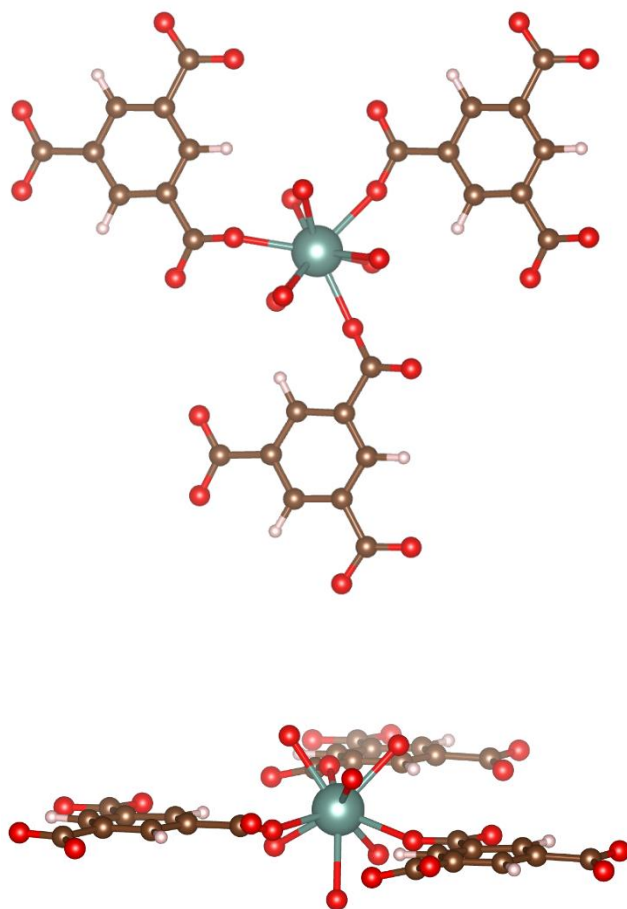

Figura S3. Coordination of the Y in the Y(BTC)(H<sub>2</sub>O)<sub>6</sub> structure obtained from the cif of GOCYAY structure [59] using the Vesta program.
